# Supplementary material for: Swelling of clay minerals: dual characteristics of K+ ions and exploration of critical influencing factors
Source: Royal Society of Chemistry journal article supplement (doi:10.1039/c8cp07567k), 2019-01-01
Supplement: c8cp07567k1.pdf [file c8cp07567k1.pdf]

**Supporting Information for**

**Swelling of Different Clay Minerals: Dual Characteristics of**

**K<sup>+</sup> ions and Exploration for Critical Influence Factor**

Xiong Li,<sup>a, b</sup> Qinyi Li,<sup>a</sup> Sen Yang,<sup>a</sup> Gang Yang<sup>a</sup>

<sup>a</sup> College of Resources and Environment & Chongqing Key Laboratory of Soil Multi-scale Interfacial Process, Southwest University, Chongqing 400715, China

<sup>b</sup> College of Resources and Environment, Northwest A & F University, Yangling 712100, Shaanxi, China

## Contents:

|                                                                                                                                                                                                                                                           |        |
|-----------------------------------------------------------------------------------------------------------------------------------------------------------------------------------------------------------------------------------------------------------|--------|
| <b>Table S1.</b> Detailed information for clay systems per unit cell. ....                                                                                                                                                                                | P. S3  |
| <b>Table S2.</b> Parameters for the CLAYFF potential. ....                                                                                                                                                                                                | P. S4  |
| <b>Table S3.</b> The $d$ -spacings ( $\text{\AA}$ ) of zero-layer (0W), one-layer (1W) and two-layer (2W) hydration states for the <b>1.00O(K<sup>+</sup>)</b> systems. ....                                                                              | P. S5  |
| <b>Figure S1.</b> Deviations of the $d$ -spacing values for K <sup>+</sup> -bearing clay systems from those with 1.00 $e\cdot\text{uc}^{-1}$ . ....                                                                                                       | P. S6  |
| <b>Figure S2.</b> Hydration energies for the first water molecules per unit cell ( $E_{\text{h1}}$ ) for K <sup>+</sup> -bearing clay systems, where the charges can be distributed in the octahedral (blue line) and tetrahedral (red line) sheets. .... | P. S7  |
| <b>Figure S3.</b> Atomic density profiles of K <sup>+</sup> , O <sub>W</sub> and H <sub>W</sub> for the three-layer hydrated (3W) states of K <sup>+</sup> -bearing clay systems. ....                                                                    | P. S8  |
| <b>Figure S4.</b> Equilibrium snapshots for the two-layer hydrated (2W) states of Na <sup>+</sup> -bearing clay systems, which differ in the number and location of charges as indicated in the legends. ....                                             | P. S9  |
| <b>Figure S5.</b> The $d$ -spacing curves of Na <sup>+</sup> -bearing clay systems as a function of water contents ( $n_{\text{H}_2\text{Ouc}^{-1}}$ ). ....                                                                                              | P. S10 |

**Table S1.** Detailed information for clay systems per unit cell

| System                       | Interlayer ion  | Number of charges | Charge location | Chemical formula <sup>a</sup>                                                                                | Molar mass <sup>a</sup> |
|------------------------------|-----------------|-------------------|-----------------|--------------------------------------------------------------------------------------------------------------|-------------------------|
| <b>1.00O(K<sup>+</sup>)</b>  | K <sup>+</sup>  | -1.00             | octahedral      | KS <sub>8</sub> Al <sub>3</sub> MgO <sub>20</sub> (OH) <sub>4</sub>                                          | 757.100                 |
| <b>1.25O(K<sup>+</sup>)</b>  | K <sup>+</sup>  | -1.25             | octahedral      | K <sub>1.25</sub> S <sub>8</sub> Al <sub>2.75</sub> Mg <sub>1.25</sub> O <sub>20</sub> (OH) <sub>4</sub>     | 788.045                 |
| <b>1.50O(K<sup>+</sup>)</b>  | K <sup>+</sup>  | -1.50             | octahedral      | K <sub>1.5</sub> S <sub>8</sub> [Al <sub>2.5</sub> Mg <sub>1.5</sub> ]O <sub>20</sub> (OH) <sub>4</sub>      | 775.250                 |
| <b>1.75O(K<sup>+</sup>)</b>  | K <sup>+</sup>  | -1.75             | octahedral      | K <sub>1.75</sub> S <sub>8</sub> Al <sub>2.25</sub> Mg <sub>1.75</sub> O <sub>20</sub> (OH) <sub>4</sub>     | 784.325                 |
| <b>1.00T(K<sup>+</sup>)</b>  | K <sup>+</sup>  | -1.00             | tetrahedral     | K <sub>1</sub> [Si <sub>7</sub> Al <sub>1</sub> ]Al <sub>4</sub> O <sub>20</sub> (OH) <sub>4</sub>           | 758.700                 |
| <b>1.25T(K<sup>+</sup>)</b>  | K <sup>+</sup>  | -1.25             | tetrahedral     | K <sub>1.25</sub> [Si <sub>6.75</sub> Al <sub>1.25</sub> ]Al <sub>4</sub> O <sub>20</sub> (OH) <sub>4</sub>  | 768.175                 |
| <b>1.50T(K<sup>+</sup>)</b>  | K <sup>+</sup>  | -1.50             | tetrahedral     | K <sub>1.5</sub> [Si <sub>6.5</sub> Al <sub>1.5</sub> ]Al <sub>4</sub> O <sub>20</sub> (OH) <sub>4</sub>     | 777.650                 |
| <b>1.75T(K<sup>+</sup>)</b>  | K <sup>+</sup>  | -1.75             | tetrahedral     | K <sub>1.75</sub> [Si <sub>6.25</sub> Al <sub>1.75</sub> ]Al <sub>4</sub> O <sub>20</sub> (OH) <sub>4</sub>  | 787.125                 |
| <b>1.00O(Na<sup>+</sup>)</b> | Na <sup>+</sup> | -1.00             | octahedral      | NaS <sub>8</sub> Al <sub>3</sub> MgO <sub>20</sub> (OH) <sub>4</sub>                                         | 741.100                 |
| <b>1.75O(Na<sup>+</sup>)</b> | Na <sup>+</sup> | -1.75             | octahedral      | Na <sub>1.75</sub> S <sub>8</sub> Al <sub>2.25</sub> Mg <sub>1.75</sub> O <sub>20</sub> (OH) <sub>4</sub>    | 739.075                 |
| <b>1.00T(Na<sup>+</sup>)</b> | Na <sup>+</sup> | -1.00             | tetrahedral     | Na <sub>1</sub> [Si <sub>7</sub> Al <sub>1</sub> ]Al <sub>4</sub> O <sub>20</sub> (OH) <sub>4</sub>          | 742.700                 |
| <b>1.75T(Na<sup>+</sup>)</b> | Na <sup>+</sup> | -1.75             | tetrahedral     | Na <sub>1.75</sub> [Si <sub>6.25</sub> Al <sub>1.75</sub> ]Al <sub>4</sub> O <sub>20</sub> (OH) <sub>4</sub> | 741.250                 |

<sup>a</sup> Before hydration.

**Table S2.** Parameters for the CLAYFF potential <sup>a</sup>

| Symbol                    | Description                                   | $q$ (e)                            | $\varepsilon$ (kcal/mol) | $\sigma$ (Å) |
|---------------------------|-----------------------------------------------|------------------------------------|--------------------------|--------------|
| ao                        | octahedral aluminum                           | +1.575                             | $1.3298 \times 10^{-6}$  | 4.7949       |
| st                        | tetrahedral silicon                           | +2.1                               | $1.8405 \times 10^{-6}$  | 3.7064       |
| ob                        | bridging oxygen                               | -1.05                              | 0.1554                   | 3.5532       |
| oh                        | hydroxyl oxygen                               | -0.95                              | 0.1554                   | 3.5532       |
| obos                      | bridging oxygen with octahedral substitution  | -1.1808                            | 0.1554                   | 3.5532       |
| obts                      | bridging oxygen with tetrahedral substitution | -1.1688                            | 0.1554                   | 3.5532       |
| ohs                       | hydroxyl oxygen with substitution             | -1.0808                            | 0.1554                   | 3.5532       |
| ho                        | hydroxyl hydrogen                             | +0.425                             |                          |              |
| hw                        | water hydrogen                                | +0.4100                            |                          |              |
| ow                        | water oxygen                                  | -0.8200                            | 0.1554                   | 3.5532       |
| Na                        | aqueous Na <sup>+</sup> ion                   | +1.0                               | 0.1301                   | 2.6378       |
| K                         | aqueous K <sup>+</sup> ion                    | +1.0                               | 0.1000                   | 3.7423       |
| Bond stretch <sup>b</sup> |                                               | $k_1$ (kcal/mol Å <sup>2</sup> )   | $r_0$ (Å)                |              |
|                           | oh-ho                                         | 554.1349                           | 1.0                      |              |
|                           | ow-hw                                         | 554.1349                           | 1.0                      |              |
|                           | ohs-ho                                        | 554.1349                           | 1.0                      |              |
| Angle bend <sup>c</sup>   |                                               | $k_2$ (kcal/mol rad <sup>2</sup> ) | $\theta_0$ (deg)         |              |
|                           | hw-ow-hw                                      | 45.7696                            | 109.47                   |              |

<sup>a</sup>  $q$  is partial charge,  $\sigma$  is the finite distance at which the inter-particle Lennard-Jones potential approaches zero, and  $\varepsilon$  is the well depth of Lennard-Jones potential;

<sup>b</sup>  $k_1$  is the harmonic potential constant and  $r_0$  is equilibrium bond length;

<sup>c</sup>  $k_2$  is the harmonic angle potential and  $\theta$  is the equilibrium angle.

**Table S3.** The  $d$ -spacings ( $\text{\AA}$ ) of zero-layer (0W), one-layer (1W) and two-layer (2W) hydration states for the **1.00O(K<sup>+</sup>)** systems

| Source    | Hydration states |       |       |
|-----------|------------------|-------|-------|
|           | 0W               | 1W    | 2W    |
| This work | 9.95             | 12.62 | 15.91 |
| Ref. 7    | 9.95             |       |       |
| Ref. 14   |                  | 12.49 | 15.61 |
| Ref. 18   |                  | 12.46 | 16.30 |
| Ref. 38   |                  | 12.25 | 14.75 |
| Ref. 39   |                  | 12.75 | 15.0  |
| Ref. 60   |                  | 12.5  | 15.3  |
| Ref. 61   |                  | 12.5  | 16.0  |

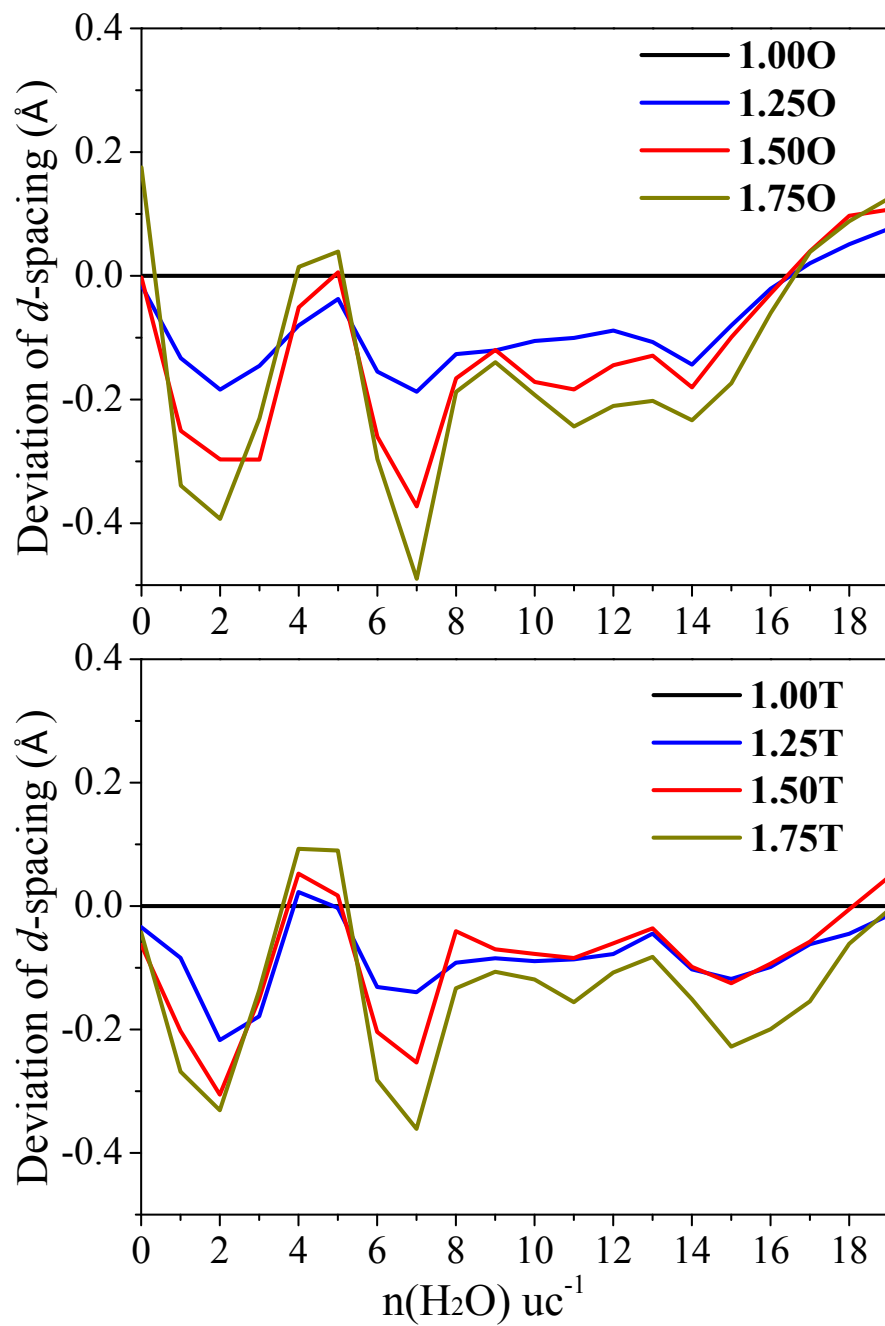

**Figure S1.** Deviations of the *d*-spacing values for K<sup>+</sup>-bearing clay systems from those with 1.00 *e*·uc<sup>-1</sup>.

The *d*-spacings of 1.00 *e*·uc<sup>-1</sup> were set to 0 and used benchmarks.

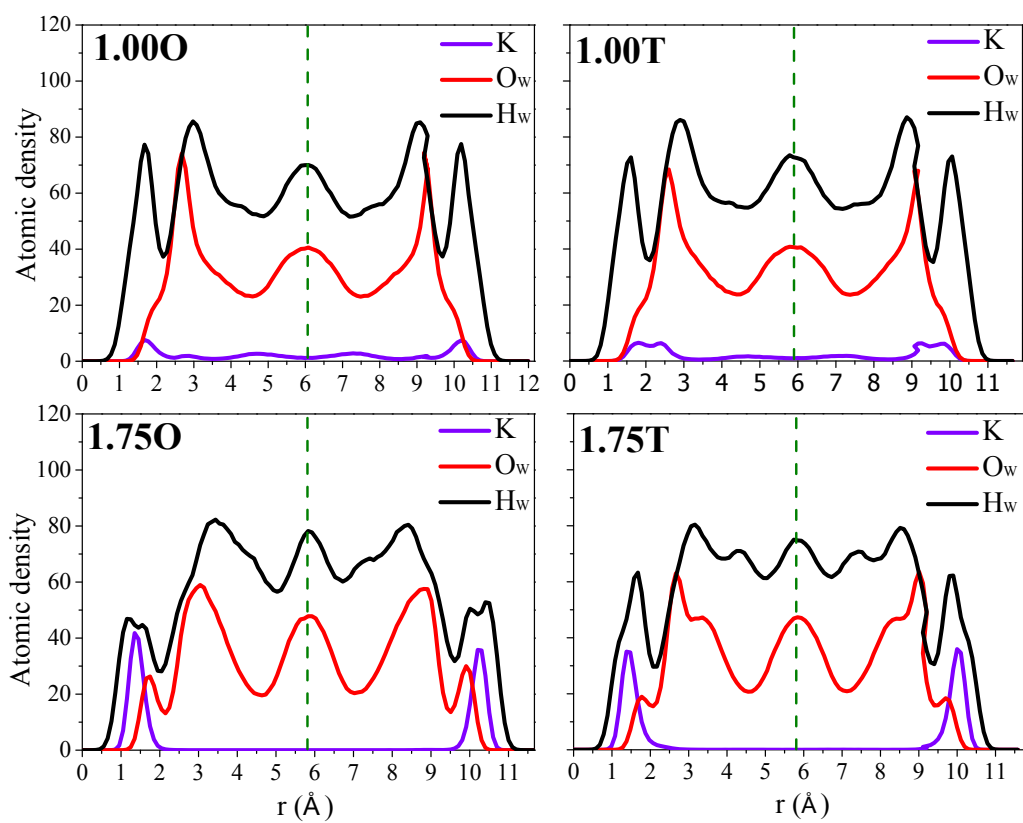

**Figure S2.** Atomic density profiles of  $K^+$ ,  $O_w$  and  $H_w$  for the three-layer hydrated (3W) states of  $K^+$ -bearing clay systems.

The central plane of interlayer space is marked in the green dashed line.

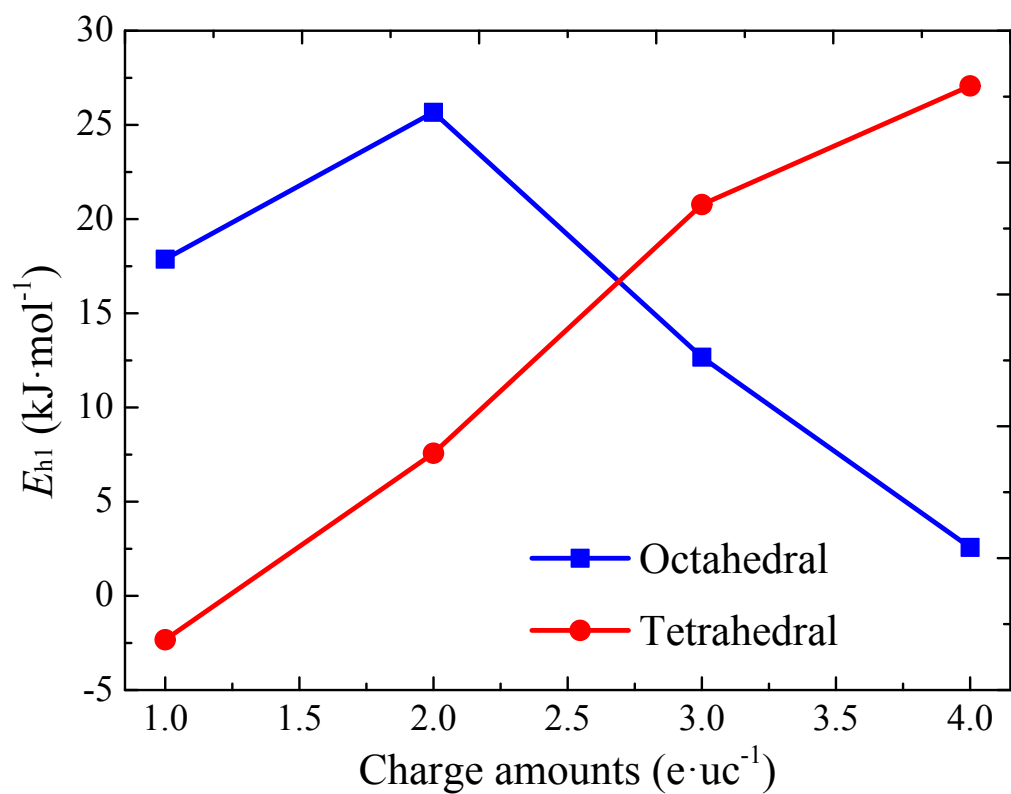

**Figure S3.** Hydration energies for the first water molecules per unit cell ( $E_{h1}$ ) for K<sup>+</sup>-bearing clay systems, where the charges can be distributed in the octahedral (blue line) and tetrahedral (red line) sheets.



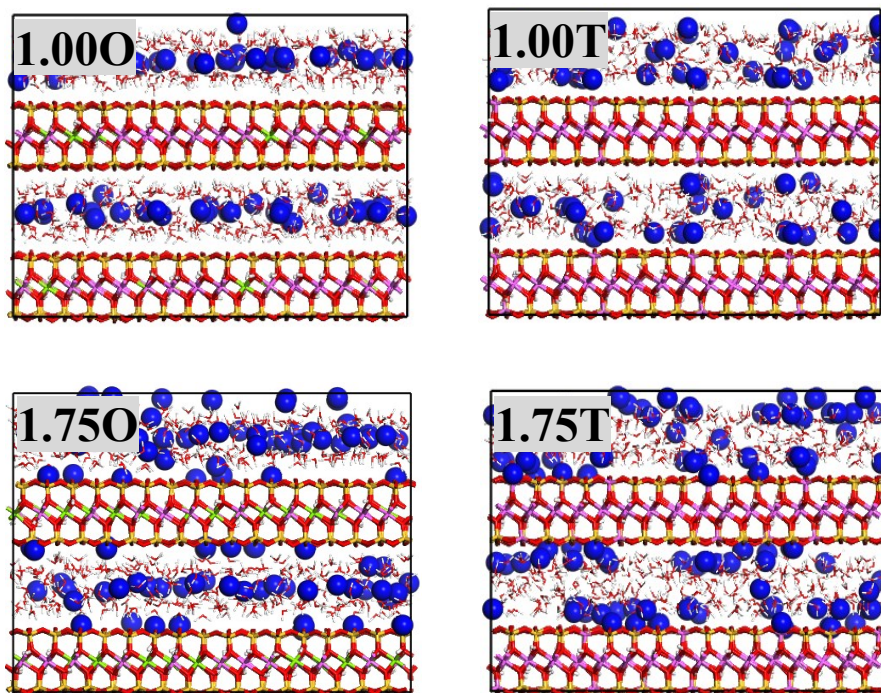

**Figure S4.** Equilibrium snapshots for the two-layer hydrated (2W) states of Na<sup>+</sup>-bearing clay systems, which differ in the number and location of charges as indicated in the legends.

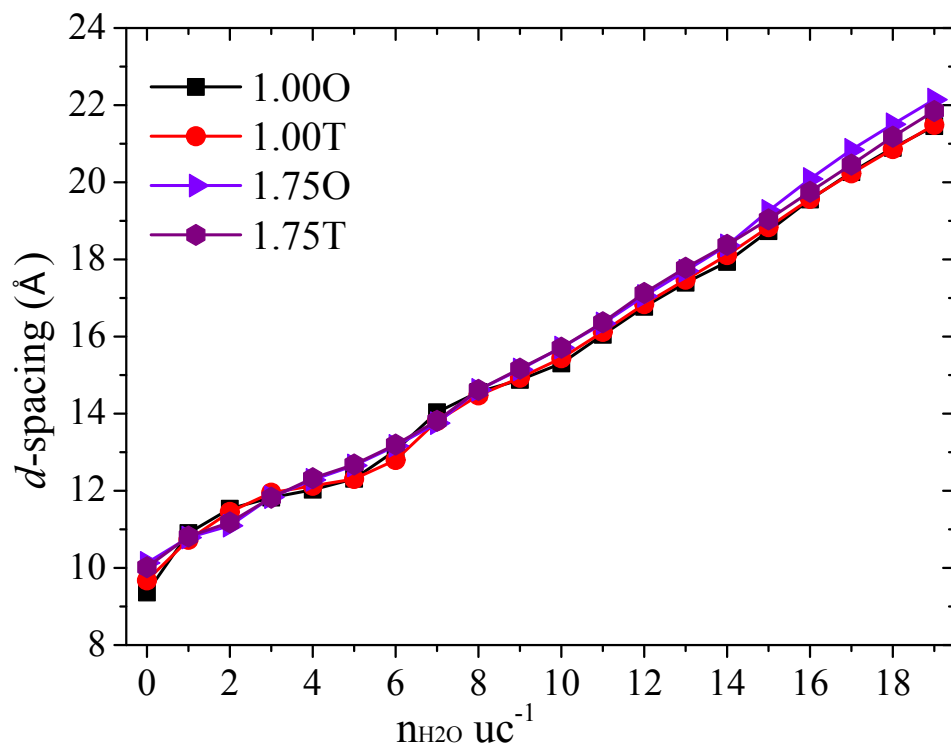

**Figure S5.** The  $d$ -spacing curves of  $\text{Na}^+$ -bearing clay systems as a function of water contents ( $n_{H_2O} \text{ uc}^{-1}$ ).

The error bars are less than the size of symbols.
